# Supplementary material for: Impact of sight and hearing loss in patients with Norrie disease: advantages of Dual Sensory clinics in patient care
Source: PubMed Central journal article supplement — BMJ Paediatr Open. 2020 Nov 16;4(1):e000781. doi: 10.1136/bmjpo-2020-000781 (PMC7670942; doi:10.1136/bmjpo-2020-000781), 2020-11-16
Supplement: bmjpo-2020-000781.draft_revisions.pdf [file bmjpo-2020-000781.draft_revisions.pdf]

# BMJ Paediatrics Open

BMJ Paediatrics Open is committed to open peer review. As part of this commitment we make the peer review history of every article we publish publicly available.

When an article is published we post the peer reviewers' comments and the authors' responses online. We also post the versions of the paper that were used during peer review. These are the versions that the peer review comments apply to.

The versions of the paper that follow are the versions that were submitted during the peer review process. They are not the versions of record or the final published versions. They should not be cited or distributed as the published version of this manuscript.

BMJ Paediatrics Open is an open access journal and the full, final, typeset and author-corrected version of record of the manuscript is available on our site with no access controls, subscription charges or pay-per-view fees (<http://bmjpaedsopen.bmj.com>).

If you have any questions on BMJ Paediatrics Open's open peer review process please email [info.bmjpo@bmj.com](mailto:info.bmjpo@bmj.com)

# BMJ Paediatrics Open

## The Burden of Sight and Hearing Loss in Patients with Norrie Disease: Advantages of Dual Sensory Clinics in Patient Care

|                               |                                                                                                                                                                                                                                                                                                                                                                                                                                                       |
|-------------------------------|-------------------------------------------------------------------------------------------------------------------------------------------------------------------------------------------------------------------------------------------------------------------------------------------------------------------------------------------------------------------------------------------------------------------------------------------------------|
| Journal:                      | <i>BMJ Paediatrics Open</i>                                                                                                                                                                                                                                                                                                                                                                                                                           |
| Manuscript ID                 | bmjpo-2020-000781                                                                                                                                                                                                                                                                                                                                                                                                                                     |
| Article Type:                 | Review                                                                                                                                                                                                                                                                                                                                                                                                                                                |
| Date Submitted by the Author: | 29-Jun-2020                                                                                                                                                                                                                                                                                                                                                                                                                                           |
| Complete List of Authors:     | Sowden, Jane; UCL Great Ormond Street Institute of Child Health Library, Developmental Biology and Cancer Department<br>Kros, Corné; University of Sussex<br>Sirimanna, Tony; Great Ormond Street Hospital for Children<br>Pagarkar, Waheeda; Great Ormond Street Hospital for Children<br>Oluonye, Ngozi; Great Ormond Street Hospital for Children, Wolfson Neurodisability Service<br>Henderson, Robert; Great Ormond Street Hospital for Children |
| Keywords:                     | Audiology, Ophthalmology, Deafness                                                                                                                                                                                                                                                                                                                                                                                                                    |
|                               |                                                                                                                                                                                                                                                                                                                                                                                                                                                       |

SCHOLARONE™  
Manuscripts

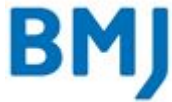

I, the Submitting Author has the right to grant and does grant on behalf of all authors of the Work (as defined in the below author licence), an exclusive licence and/or a non-exclusive licence for contributions from authors who are: i) UK Crown employees; ii) where BMJ has agreed a CC-BY licence shall apply, and/or iii) in accordance with the terms applicable for US Federal Government officers or employees acting as part of their official duties; on a worldwide, perpetual, irrevocable, royalty-free basis to BMJ Publishing Group Ltd ("BMJ") its licensees and where the relevant Journal is co-owned by BMJ to the co-owners of the Journal, to publish the Work in this journal and any other BMJ products and to exploit all rights, as set out in our [licence](#).

The Submitting Author accepts and understands that any supply made under these terms is made by BMJ to the Submitting Author unless you are acting as an employee on behalf of your employer or a postgraduate student of an affiliated institution which is paying any applicable article publishing charge ("APC") for Open Access articles. Where the Submitting Author wishes to make the Work available on an Open Access basis (and intends to pay the relevant APC), the terms of reuse of such Open Access shall be governed by a Creative Commons licence – details of these licences and which [Creative Commons](#) licence will apply to this Work are set out in our licence referred to above.

Other than as permitted in any relevant BMJ Author's Self Archiving Policies, I confirm this Work has not been accepted for publication elsewhere, is not being considered for publication elsewhere and does not duplicate material already published. I confirm all authors consent to publication of this Work and authorise the granting of this licence.

Submission Version - ND Dual Sensory Clinics

25 June 2020

1  
2  
3  
4  
5  
6  
7  
8  
9  
10  
11  
12  
13  
14  
15  
16  
17  
18  
19  
20  
21  
22  
23  
24  
25  
26  
27  
28  
29  
30  
31  
32  
33  
34  
35  
36  
37  
38  
39  
40  
41  
42  
43  
44  
45  
46  
47  
48  
49  
50  
51  
52  
53  
54  
55  
56  
57  
58  
59  
60

1 **The Burden of Sight and Hearing Loss in Patients with Norrie**  
2 **Disease: Advantages of Dual Sensory Clinics in Patient Care**

3  
4 Jane C Sowden<sup>1</sup>, Corné J Kros<sup>2</sup>, Tony Sirimanna<sup>3</sup>, Waheeda Pagarkar<sup>3</sup>, Ngozi  
5 Oluonye<sup>4</sup>, Robert H Henderson<sup>3</sup>

6 <sup>1</sup>Developmental Biology and Cancer Department, UCL Great Ormond Street  
7 Institute of Child Health, 30 Guilford Street, London WC1N 1EH, United  
8 Kingdom.

9 <sup>2</sup>School of Life Sciences, University of Sussex, Falmer, Brighton BN1 9QG,  
10 United Kingdom.

11 <sup>3</sup>Great Ormond Street Hospital, Great Ormond Street, London, WC1N 3JH,  
12 United Kingdom.

13 <sup>4</sup>Wolfson Neurodisability Service, Great Ormond Street Hospital, Great  
14 Ormond Street, London, WC1N 3JH, United Kingdom

15 **Correspondence to:** Professor Jane Sowden  
16 Developmental Biology and Cancer Department  
17 UCL Great Ormond Street Institute of Child Health  
18 30 Guilford Street  
19 London  
20 WC1N 1EH  
21 [j.sowden@ucl.ac.uk](mailto:j.sowden@ucl.ac.uk), +44 20 7905 2121

22 **Short title:** Norrie Disease and Dual Sensory Clinics Manuscript

23 **Key words:** Audiology, Deafness, Ophthalmology

24 **Abstract word count:** 286

25 **Word count:** 3,076  
26

**Abstract**

Norrie Disease (ND) is a rare, X-linked condition of visual and auditory impairment, often presenting with additional neurological features and developmental delays of varying severity. While all affected patients are born blind, or lose their vision in infancy, progressive sensorineural hearing loss develops in the majority of cases and is typically detected in the second decade of life. A range of additional symptoms of ND, such as seizure disorders, typically appear from a young age, but it is difficult to predict the range of symptoms ND patients will experience. After growing up without vision, hearing loss represents the greatest worry for many ND patients, as they may lose the ability to participate in previously enjoyed activities or to communicate with others.

Dual sensory loss places a physical, psychosocial and financial burden on both ND patients and their families. Routine monitoring of the condition is required in order to identify, treat, and provide support for emerging health problems, leading to a large burden of medical appointments. Many patients need to travel long distances to meet with specialists, representing a further burden on time and finances. Additionally, the rare nature of dual sensory impairment in children means that few clinical environments are designed to meet their needs. Dual Sensory clinics are multidisciplinary environments designed for sensory-impaired children and have been suggested to alleviate the burden of diseases involving sensory loss such as ND.

Here, we discuss the diagnosis, monitoring and management of ND and the burden it places on paediatric patients and their caregivers. We describe the potential for Dual Sensory clinics to reduce this burden through providing an appropriate clinical environment, access to multiple clinical experts in one visit, and ease of monitoring for ND patients.

## 1 INTRODUCTION

2 Norrie Disease (ND; OMIM 310600, **Figure 1**) is a rare condition with over  
3 400 cases described, but its prevalence and incidence is unknown.<sup>1</sup> ND is  
4 caused by mutations in the Norrie disease pseudoglioma (*NDP*) gene, located  
5 on the X chromosome, therefore the vast majority of patients are male.  
6 However, cases of symptomatic female carriers have been reported.<sup>2, 3</sup> ND is  
7 the most severe of a spectrum of vitreoretinopathies including familial  
8 exudative vitreoretinopathy (FEVR), retinopathy of prematurity (ROP) and  
9 Coat's Disease.<sup>4</sup>

10 Patients with ND typically present with congenital or infantile blindness;<sup>5</sup> the  
11 majority of whom are blind from birth. Ocular signs of the disease are present  
12 at birth or develop during early infancy, with clinical examination of the eye  
13 often revealing microphthalmia (abnormally small eyes), corneal opacity,  
14 vitreous haemorrhage (leakage of blood into the eye), cataracts, dysplastic  
15 retinal tissue and retinal detachment.<sup>4</sup> Parents may notice a white reflex in  
16 their child's pupils, or that their child fails to respond to light.<sup>6-8</sup>

17 Most ND patients will pass their newborn hearing screen but the majority will  
18 experience progressive sensorineural hearing loss.<sup>9</sup> Early hearing loss can be  
19 asymptomatic, with initial loss of high frequencies progressing to severe  
20 symmetric hearing loss, typically by 35 years of age.<sup>9, 10</sup> Patients consistently  
21 report intermittent hearing loss with slow deterioration over time, tinnitus and  
22 periods of 'stiffness',<sup>9</sup> though speech discrimination is usually well  
23 preserved.<sup>10, 11</sup> Of those with hearing loss, most experience its onset by their  
24 mid-20s, with one study reporting the median age of onset was 12 years of  
25 age.<sup>9</sup> Referral of ND patients to audiology after diagnosis is important as  
26 regular monitoring allows early intervention from the onset of impairment.

27 In addition to dual sensory loss, ND is associated with cognitive impairment,  
28 neuro developmental disorders (e.g. autism spectrum disorder [ASD]),  
29 peripheral vascular disease (PVD) and seizure disorders,<sup>9, 12-15</sup> with one study  
30 of 56 patients reporting cognitive impairment in 28%, ASD in 27%, PVD in

1 38% and seizure disorders in approximately 10% of patients.<sup>9</sup> The  
2 presentation of ND, even within families carrying identical NDP mutations, can  
3 be extremely variable.<sup>16, 17</sup> This variability may be due to environmental,  
4 genetic or epigenetic factors, and in some cases both partially sighted and  
5 blind individuals have been found to carry the same mutation.<sup>17</sup>

6 The multifaceted nature of ND, and the presence of dual sensory impairments,  
7 presents a major burden to both patients and caregivers. Few clinical  
8 environments are suitably adapted for children with dual sensory impairments.  
9 Similarly, diagnosis and long-term monitoring of ND requires repeat visits to  
10 specialist clinicians with knowledge of the best testing methods and  
11 interventions. This suggests that a holistic approach to care involving the  
12 review of ocular and extraocular symptoms simultaneously would be  
13 beneficial to ND patients. Additionally, a multidisciplinary team, including  
14 psychologists and social workers, should be included in patient care to help  
15 maximise patient outcomes.

16 Dual Sensory clinics have been suggested to improve the clinical experience  
17 of children with sensory impairments. These clinics are designed to  
18 accommodate the needs of sensory impaired children while providing access  
19 to multiple clinicians in one visit. This reduces the stress and burden  
20 associated with numerous, separate medical appointments and optimises  
21 communication between professionals. Here, we discuss the challenges  
22 experienced by ND patients, the current clinical approaches for ND  
23 management and the potential advantages of Dual Sensory clinics for this  
24 complex disease.

### 25 **Burden of Norrie Disease**

26 Dual sensory loss is characterised by impairment in two sensory modalities –  
27 in ND these are hearing and vision in ND. Sensorineural hearing loss may  
28 occur at a young age in ND patients, highlighting the need for early

1 intervention. Dual sensory loss represents a number of challenges for both  
2 the affected patient and their caregivers (

3

4 **Figure 2; Box 1**). These include communication problems, additional  
5 educational needs, and feelings of isolation. Patients with ND are not thought  
6 to experience significant hearing loss before language acquisition<sup>9</sup> but  
7 developing communication abilities remains a concern.

8 *Physical and Psychosocial Burden*

9 *Visual Impairment*

10 Visual impairment represents the most immediate concern in ND, so  
11 caregivers must adapt to the needs of a blind child in both family and  
12 educational environments. Visually impaired children may have problems  
13 establishing and maintaining sleep/wake routines.<sup>18</sup> Sleep disorders have  
14 been noted in some ND case reports<sup>19</sup> and can have serious effects on mood,  
15 behaviour, and ability to learn, as well as placing stress on the patient's  
16 family.<sup>18</sup>

17 Visual impairment has a significant impact on early child development, with  
18 many skills (including sitting, crawling, walking and sound localisation)  
19 emerging later than in fully sighted children. Developmental regression has  
20 been reported in ND patients,<sup>20</sup> while developmental delays and social  
21 communication difficulties can affect children with profound visual  
22 impairments.<sup>21, 22</sup>

23 Language skills are often delayed and may develop atypically in visually  
24 impaired children. ND patients may take longer to both understand and use  
25 language and have difficulties with social communication; however, there is  
26 limited evidence regarding the impact of sensory loss in ND patients and their  
27 ability to build and maintain relationships. Communication with sighted  
28 children may be difficult as the ND patient cannot see the non-verbal



1 communication or body language of their peers, which are important  
2 contributors to social interactions. Difficulty in communication and play may  
3 lead to feelings of isolation and being different to peers, which may contribute  
4 to the mental health vulnerabilities recognised in visually impaired children.<sup>23</sup>

5 In addition to the impact on development, visual impairment represents a  
6 significant barrier to teaching independence skills such as toileting, navigation,  
7 cooking and eating. As ND patients grow older, the cosmetic impact of eye  
8 shrinkage may become a concern, and should be monitored by the clinical  
9 team.

### 10 *Dual Sensory Loss*

11 Developing independence skills as a blind individual often involves using  
12 auditory cues.<sup>21, 22</sup> Progressive hearing loss may further complicate ND  
13 patients' day-to-day life by negating previously developed mechanisms for life  
14 without vision. Consequently, blind and hard of hearing people need optimum  
15 binaural amplification (coordinated amplification between both ears) to ensure  
16 optimal hearing, and localisation of sound (including speech), in every  
17 listening condition. Audiology professionals should be aware of the hearing  
18 aid requirements to achieve these amplification needs for their ND patients.<sup>24,</sup>  
19 <sup>25</sup> Similarly, the impacts of hearing loss are exacerbated by blindness. ND  
20 patients with dual sensory impairment cannot use strategies for improving  
21 speech discernment and communication such as sign language and lip  
22 reading.

23 Despite dual sensory loss, ND patients exhibit a high degree of independence,  
24 with one study reporting that of 32 patients aged  $\geq 18$  years, 75% had lived  
25 or were living independently;<sup>9</sup> however, independence remains a concern as  
26 hearing loss progresses. For ND patients with more severe neurological and  
27 cognitive features, independence may never be possible, placing a long-term  
28 psychosocial and care burden on their families.<sup>26</sup>

1 Dual sensory loss can be isolating and may discourage patients from  
2 participating in activities they previously enjoyed. A lack of awareness of  
3 effective communication methods in the general public may increase these  
4 social barriers for patients (

5  
6 **Figure 2; Box 2).** Hearing loss may be particularly challenging in social  
7 environments such as parties or restaurants which have high levels of  
8 background noise (

9  
10 **Figure 2; Box 3).**

11 Progressive hearing loss also increases the psychological burden of ND on  
12 patients. Transient depression, directly related to the onset of hearing loss,  
13 was reported by the majority of cognitively intact ND patients included in a  
14 study of clinical histories and genotype data.<sup>9</sup> A further case study described  
15 how a patient withdrew from society as his hearing deteriorated.<sup>27</sup> These  
16 findings highlight the psychological impact of hearing loss and the need for  
17 ND patients to receive early, proactive, clinical and emotional support.

#### 18 *Financial Burden*

19 ND patients have many medical appointments to attend, often with specialists  
20 or at clinics that are not local to them, resulting in substantial travel costs.  
21 Further costs may be incurred for childcare or loss of earnings due to days  
22 missed from work.

23 Hearing aids may be prescribed to patients with hearing loss, however, the  
24 assistive devices provided by health and education services (free of charge in  
25 the UK) or medical insurance may not be of sufficient quality or the most  
26 appropriate for patients' requirements. This can represent a substantial  
27 financial burden to families (

1

2 **Figure 2; Boxes 4 and 5**), especially if spare pairs of hearing aids are  
3 required to cover loss or repair.

#### 4 *Day-to-Day Support*

5 It is important that clinicians understand the most appropriate ways to  
6 interact with blind and hearing impaired paediatric patients.<sup>28</sup> Clinicians may  
7 be unaware of the best approach to inform patients of what is happening  
8 during their appointment, such as explaining when they are writing notes or  
9 preparing equipment. Clinicians may also find it difficult to communicate how  
10 a patient should position themselves for a test, and may instead resort to  
11 manipulating the patient themselves.<sup>28</sup> Parents often assist with the  
12 explanation and coordination between clinicians and their child,<sup>28</sup> which is  
13 important if the clinician is less familiar with the disease.

#### 14 **Current Clinical Approach**

##### 15 *Diagnosis*

16 Diagnosis of ND can be a lengthy process (**Figure 3**). Initially, referral to an  
17 ophthalmologist is made upon observation of nystagmus (rapid, involuntary  
18 eye movements), leukocoria (abnormal white reflection from the retina) or a  
19 failure of the infant to fix their gaze and follow movement. Due to the rarity  
20 of the condition, appropriate referral and diagnosis may be delayed, and  
21 misdiagnoses (e.g. of glaucoma, congenital cataract, or retinoblastoma) can  
22 occur. Most patients will eventually be referred to a specialist paediatric  
23 ophthalmologist, where they will be fully diagnosed by a combination of  
24 ophthalmic examination and investigation including B-mode ultrasound and  
25 subsequent genetic testing.

26 Though not routine, it is possible to identify ND *in utero* if the mother is a  
27 suspected or known carrier of the disease. Amniocentesis and genetic testing

1 can be used to identify pathogenic *NDP* variants and determine fetal sex,<sup>29</sup>  
2 while early signs of ocular pathology can be detected using ultrasound.<sup>30, 31</sup>

### 3 *Management*

4 Management of patients with ND requires input from a team of specialists and  
5 allied healthcare professionals (**Figure 1**), including hearing and speech  
6 therapists, an education team (including qualified teachers for the hearing  
7 impaired and visually impaired), social workers, support groups and  
8 psychologists. Early intervention from developmental specialists is essential to  
9 guide parents in how to assist their child in all areas of development.<sup>32</sup> This  
10 ensures ND patients receive the support they need to maximise their potential.  
11 At the clinician's discretion, surgical interventions may be offered to paediatric  
12 ND patients in an attempt to preserve light perception (**Figure 3**); however,  
13 published case studies demonstrate variable results and the long-term benefit  
14 is unclear.<sup>8, 9, 29, 33-35</sup> These outcomes must be weighed against the risks  
15 associated with surgery (infection, bleeding and glaucoma), which may result  
16 in eye pain and the need for enucleation. In two cases, retinal attachment  
17 and some visual acuity was preserved following surgical intervention after *in*  
18 *utero* diagnosis and premature delivery.<sup>29, 36</sup>

19 As soon as blindness is detected in an infant they should be referred to a  
20 specialist developmental paediatrician with the expertise and resources to  
21 assess developmental issues (**Figure 3**). Work with the developmental team  
22 should begin as early as possible to minimise the impact of visual impairment  
23 on the patient.

24 After the detection of hearing impairment, clinicians will consider how best to  
25 manage dual sensory loss. Hearing aids are a common intervention for ND  
26 patients<sup>4, 11</sup> and treating audiology professionals should have a good  
27 knowledge of the range of hearing aids available (including those not  
28 accessible through the patient's health service or medical insurance) in order  
29 to suggest the most appropriate devices. As hearing loss is progressive in ND,

1  
2  
3 1 periodic and proactive hearing aid upgrades and the provision of assistive  
4  
5 2 hearing devices may be required to ensure optimal amplification for patients.  
6  
7 3 Clinicians should be familiar with the cochlear implants and vibro-tactile aids  
8  
9 4 available for their ND patients. Some ND patients use cochlear implants, and  
10  
11 5 have reported positive impacts on their quality of life.<sup>9, 27</sup>

### 6 *Monitoring*

7  
8 Routine monitoring of ND patients is important for identifying the onset of  
9  
10 8 developmental delays and hearing loss (**Figure 3**). Monitoring of the eyes  
11  
12 9 should also be conducted to ensure they are not causing pain and, in patients  
13  
14 10 with no light perception, consideration should be given to the fitting of scleral  
15  
16 11 shells both for improved cosmesis and to promote midfacial growth.

17  
18 There are no guidelines for monitoring hearing loss in ND – currently, hearing  
19  
20 12 difficulties observed by caregivers typically trigger a referral for assessment.  
21  
22 13 Mouse model of ND shows early changes in the blood vessels of the cochlear  
23  
24 14 (stria vascularis), and<sup>37</sup> cochlear dysfunction is believed to occur before  
25  
26 15 hearing loss can be detected using conventional techniques. Careful clinical  
27  
28 16 monitoring for early diagnosis and intervention is necessary (**Figure 3**), as  
29  
30 17 mild, high-frequency hearing loss is often not detected by caregivers. Hearing  
31  
32 18 is extremely important for the blind child, and even subclinical losses can  
33  
34 19 have an impact on their developmental trajectory. Early referral to audiology  
35  
36 20 is recommended to allow for monitoring with appropriate behavioural or  
37  
38 21 objective tests such as otoacoustic emissions (sounds generated from within  
39  
40 22 the inner ear) for the early detection of cochlear dysfunction. Proactive early  
41  
42 23 intervention can help improve speech and language development in children  
43  
44 24 with mild hearing loss.<sup>38</sup>

45  
46  
47 26 Though reduced vestibular function is commonly associated with  
48  
49 27 sensorineural hearing loss,<sup>39</sup> it is not known whether the vestibular system is  
50  
51 28 affected by ND. The vestibular system is important for postural stability in the  
52  
53 29 absence of visual cues<sup>40</sup> and so its function should be assessed in ND patients.

## 1 **Advantages of Dual Sensory Clinics**

2 Dual Sensory clinics have been proposed as a way of reducing the burden of  
3 complex sensory disorders on patients (**Figure 4,**

4  
5  
6 Figure 5) and may provide wide ranging benefits to patients and clinicians.

### 7 *Multidisciplinary Diagnostic Facility*

8 Within the environment of a Dual Sensory clinic, clinicians are trained in best  
9 communication practices for patients with sensory impairments. Appropriate  
10 communication, and provision of information in accessible formats (e.g.  
11 Braille) positively impacts sensory impaired children (

12  
13  
14 Figure 5; **Boxes 2 and 5**); it ensures that hospital staff address ND patients,  
15 rather than their caregivers, which reduces stress and enables patients to feel  
16 included and informed about their care.<sup>28</sup> Effective communication is  
17 important during consultations and may involve allowing ND patients to  
18 handle devices (e.g. hearing aids, cochlear implant processors) or explaining  
19 test results appropriately.<sup>28</sup> This helps patients to understand the procedures  
20 they may receive and, when appropriate, assist them in making informed  
21 decisions about their care. Communication between clinicians regarding  
22 patient needs and care may be improved by bringing them together in a  
23 multidisciplinary environment, so improving patient experiences.<sup>28</sup>

24 Hearing assessments are often challenging and time consuming in patients  
25 with ND due to their blindness. Some hearing tests utilise visual cues so  
26 require adaption for ND patients. If reliable results are not obtained, a

1 hearing test under general anaesthetic must be considered. Hearing  
2 monitoring requires highly experienced staff, who are aware of the needs of  
3 ND patients and can effectively communicate them, ensuring patients'  
4 comfort and understanding of the procedures.

5 In addition to training and communication, a multidisciplinary environment  
6 can promote collaboration and knowledge sharing between clinical experts. A  
7 network of such clinics could foster broader collaboration and opportunities  
8 for clinicians to discuss patient cases with a wider selection of their peers –  
9 this interaction can improve a clinician's understanding of complex sensory  
10 disorders.

#### 11 *Convenience*

12 Dual Sensory clinics allow patients to be reviewed by multiple specialist  
13 clinicians in one visit, reducing the overall number of hospital visits they need  
14 to attend. This may reduce stress, particularly for patients with additional  
15 features such as ASD. Reductions in the time spent travelling to and attending  
16 appointments can also reduce absences from school for patients, and from  
17 the workplace for their parents (

18  
19  
20 Figure 5; **Box 4**).

#### 21 *Appropriate Environment*

22 Many hospital environments are not designed with sensory impaired  
23 paediatric patients in mind. Dual Sensory clinics aim to provide comfortable,  
24 accessible and functional environments for sensory impaired patients. This  
25 includes providing appropriate facilities close to waiting rooms, and ensuring  
26 that the waiting room and reception area have working hearing loops.<sup>28</sup>  
27 Entertainment specifically for sensory impaired children, such as books in



1 Braille and multisensory toys for children of all ages, positively impacts the  
2 waiting experience.<sup>28</sup> Sensory impaired children may have a preference for, or  
3 greater sensitivity to, their sense of touch and smell. A Dual Sensory clinic  
4 may be able to consider this in its design, helping to provide an environment  
5 better suited to patients' needs (

6

7

8 **Figure 5; Box 2).**<sup>28</sup>

9 *Early Detection of Health Problems*

10 Access to a range of clinicians with specialist disease knowledge increases the  
11 chances that health issues are identified more quickly, allowing timely  
12 provision of appropriate interventions. Parents have reported that delayed  
13 diagnoses contribute to anxiety and stress;<sup>11</sup> the ease of monitoring health  
14 conditions in a Dual Sensory or multidisciplinary clinic may help to alleviate  
15 this.

16 *Ongoing Challenges*

17 Despite the advantages of offering many different services at one  
18 appointment, careful consideration needs to be taken when dealing with very  
19 young or developmentally delayed children who may struggle with medical  
20 procedures. Clinicians must decide which tests need to be performed most  
21 urgently so as not to overburden the patient during their visit – for example,  
22 balance tests and ophthalmic examinations with dilating drops are unpleasant  
23 for the patient, leading to discomfort, tiredness and poor compliance with  
24 subsequent tests.

25 For many patients with rare, multisensory diseases an ongoing challenge is  
26 accessing services tailored to their condition. While the opening of new,  
27 specialist clinics represents an advance in care for such children, these are



1 often concentrated in large cities. This small number of clinics and their  
2 limited locations can still present issues of travel time and costs for ND  
3 patients and their families.

#### 4 **Summary**

5 ND is a complex, multifaceted disease of dual sensory impairment that  
6 imposes a significant burden on patients and caregivers. While congenital  
7 blindness presents challenges for communication, development and  
8 adaptation to the sighted world, development of progressive hearing loss  
9 adds to the risk of isolation and psychosocial impact. Early intervention to  
10 provide developmental support and identify subclinical hearing loss is  
11 necessary to ensure ND patients can reach their full potential. The complex  
12 nature of ND means patients may attend many medical appointments,  
13 resulting in absence from school and their caregivers taking time away from  
14 work. Additional cost implications may result from the need for specialist  
15 equipment and hearing interventions.

16 Many hospital environments are not suited for children with multiple  
17 disabilities and clinicians may be unfamiliar with the best communication  
18 practices for interacting with such patients. Provision of Dual Sensory clinics  
19 may optimise patient care and experience while streamlining visits to reduce  
20 the necessary absence from school, work or social activities.

#### 21 **ACKNOWLEDGEMENTS**

22 The authors would especially like to thank the Norrie Disease families and  
23 patients who provided quotes about their experience of the disease. The  
24 authors thank Dr Aara Patel and Valda Pauzuolyte, UCL Great Ormond Street  
25 Institute of Child Health, London, for reviewing and critiquing the manuscript.  
26 The authors also acknowledge Wendy Horrobin, The Norrie Disease  
27 Foundation, London, for publication coordination and Katherine Massey, PhD,  
28 and Sarah Jayne Clements, PhD, from Costello Medical, UK, for medical  
29 writing and editorial assistance based on the authors' input and direction. This

1 publication was developed free-of-charge on a *pro bono* basis by Costello  
2 Medical.

### 3 **FUNDING**

4 Third-party writing assistance for this article, provided by Katherine Massey,  
5 PhD, and Sarah Jayne Clements, PhD, Costello Medical, UK, was provided by  
6 Costello Medical free-of-charge on a *pro bono* basis in accordance with Good  
7 Publication Practice (GPP3) guidelines (<http://www.ismpp.org/gpp3>).

8 JCS is supported by the National Institute for Health Research (NIHR) Great  
9 Ormond Street Hospital Biomedical Research Centre and the Great Ormond  
10 Street Hospital Children's Charity and is an NIHR Senior Investigator. The  
11 views expressed are those of the authors and not necessarily those of the  
12 NHS, the NIHR or the Department of Health.

### 13 **AUTHORS' CONTRIBUTIONS**

14 Drafting the article or revising it critically for important intellectual content:  
15 JCS, RHH, CJK, TS, WP, NO; final approval of the version of the article to be  
16 published: JCS, RHH, CJK, TS, WP, NO. Responsibility for opinions,  
17 conclusions and interpretation of clinical evidence, and the submitted draft,  
18 lies with the authors.

### 19 **DISCLOSURES**

20 JCS: None declared; RHH: Received fees for advisory board attendance from  
21 Novartis, DORC and Alcon; none are relevant to this article or subject; CJK:  
22 None declared; TS: None declared; WP: None declared; NO: None declared.

23

**REFERENCES**

1. Sims K. Norrie disease. Available at [https://www.orpha.net/consor/cgi-bin/OC\\_Exp.php?Lng=EN&Expert=649](https://www.orpha.net/consor/cgi-bin/OC_Exp.php?Lng=EN&Expert=649) (accessed 06 December 2019). Orphanet Encyclopedia.
2. Sellar MJ, Pal K, Horsley S, et al. A fetus with an X;1 balanced reciprocal translocation and eye disease. *J Med Genet* 1995;32:557-60.
3. Shastry BS, Hiraoka M, Trese DC, et al. Norrie disease and exudative vitreoretinopathy in families with affected female carriers. *Eur J Ophthalmol* 1999;9:238-42.
4. Sims KB. NDP-Related Retinopathies. In: Adam MP, Ardinger HH, Pagon RA, Wallace SE, Bean LJH, Stephens K, Amemiya A, eds. *GeneReviews*(R). Seattle (WA): University of Washington, Seattle. GeneReviews is a registered trademark of the University of Washington, Seattle. All rights reserved., 1993.
5. Norrie G. Causes of Blindness in Children. *Acta Ophthalmologica* 1927;5:357-386.
6. Saini JS, Sharma A, Pillai P, et al. Norries disease. *Indian J Ophthalmol* 1992;40:24-6.
7. Sukumaran K. Bilateral Norrie's disease in identical twins. *Br J Ophthalmol* 1991;75:179-80.
8. Zhang XY, Jiang WY, Chen LM, et al. A novel Norrie disease pseudoglioma gene mutation, c.-1\_2delAAT, responsible for Norrie disease in a Chinese family. *Int J Ophthalmol* 2013;6:739-43.
9. Smith SE, Mullen TE, Graham D, et al. Norrie disease: Extraocular clinical manifestations in 56 patients. *American Journal of Medical Genetics Part A* 2012;158A:1909-1917.
10. Halpin C, Owen G, Gutierrez-Espeleta GA, et al. Audiologic features of Norrie disease. *Ann Otol Rhinol Laryngol* 2005;114:533-8.
11. Halpin C, Sims K. Twenty years of audiology in a patient with Norrie disease. *Int J Pediatr Otorhinolaryngol* 2008;72:1705-10.
12. Blodi FC, Hunter WS. Norrie's disease in North America. *Doc Ophthalmol* 1969;26:434-50.
13. Michaelides M, Luthert PJ, Cooling R, et al. Norrie disease and peripheral venous insufficiency. *Br J Ophthalmol* 2004;88:1475.
14. Okumura A, Arai E, Kitamura Y, et al. Epilepsy phenotypes in siblings with Norrie disease. *Brain Dev* 2015;37:978-82.
15. Yamada K, Limprasert P, Ratanasukon M, et al. Two Thai families with Norrie disease (ND): association of two novel missense mutations with severe ND phenotype, seizures, and a manifesting carrier. *Am J Med Genet* 2001;100:52-5.
16. Allen RC, Russell SR, Streb LM, et al. Phenotypic heterogeneity associated with a novel mutation (Gly112Glu) in the Norrie disease protein. *Eye (Lond)* 2006;20:234-41.
17. Zaremba J, Feil S, Juszko J, et al. Intrafamilial variability of the ocular phenotype in a Polish family with a missense mutation (A63D) in the Norrie disease gene. *Ophthalmic Genet* 1998;19:157-64.

- 1  
2  
3 1 18. Stores G, Ramchandani P. Sleep disorders in visually impaired children.  
4 2 Dev Med Child Neurol 1999;41:348-52.  
5 3 19. Vossler DG, Wyler AR, Wilkus RJ, et al. Cataplexy and monoamine  
6 4 oxidase deficiency in Norrie disease. Neurology 1996;46:1258-61.  
7 5 20. Harendra de Silva DG, de Silva DB. Norrie's disease in an Asian family.  
8 6 The British journal of ophthalmology 1988;72:62-64.  
9 7 21. Dale N, Sonksen P. Developmental outcome, including setback, in  
10 8 young children with severe visual impairment. Dev Med Child Neurol  
11 9 2002;44:613-22.  
12 10 22. Dale NJ, Tadic V, Sonksen P. Social communicative variation in 1-3-  
13 11 year-olds with severe visual impairment. Child Care Health Dev  
14 12 2014;40:158-64.  
15 13 23. Harris J, Lord C. Mental health of children with vision impairment at 11  
16 14 years of age. Dev Med Child Neurol 2016;58:774-9.  
17 15 24. Brabyn JA, Schneck ME, Haegerstrom-Portnoy G, et al. Dual sensory  
18 16 loss: overview of problems, visual assessment, and rehabilitation.  
19 17 Trends Amplif 2007;11:219-26.  
20 18 25. Simon HJ, Levitt H. Effect of dual sensory loss on auditory localization:  
21 19 implications for intervention. Trends Amplif 2007;11:259-72.  
22 20 26. Bleeker-Wagemakers EM, Zweije-Hofman I, Gal A. Norrie disease as  
23 21 part of a complex syndrome explained by a submicroscopic deletion of  
24 22 the X chromosome. Ophthalmic Paediatr Genet 1988;9:137-42.  
25 23 27. Jacques D, Dubois T, Zdanowicz N, et al. Cochlear Implants and  
26 24 Psychiatric Assessments: a Norrie Disease Case Report. Psychiatr  
27 25 Danub 2017;29:259-261.  
28 26 28. Ellis L, Keenan L., Hodges., L. The experiences of people with rare  
29 27 syndromes and sensory impairments in hospitals and clinics. Available  
30 28 at  
31 29 [https://www.sense.org.uk/umbraco/surface/download/download?filepa](https://www.sense.org.uk/umbraco/surface/download/download?filepath=/media/1294/research-the-experiences-of-people-with-rare-syndromes-and-sensory-impairments-in-hospitals-and-clinics-report.pdf)  
32 30 [th=/media/1294/research-the-experiences-of-people-with-rare-](https://www.sense.org.uk/umbraco/surface/download/download?filepath=/media/1294/research-the-experiences-of-people-with-rare-syndromes-and-sensory-impairments-in-hospitals-and-clinics-report.pdf)  
33 31 [syndromes-and-sensory-impairments-in-hospitals-and-clinics-report.pdf](https://www.sense.org.uk/umbraco/surface/download/download?filepath=/media/1294/research-the-experiences-of-people-with-rare-syndromes-and-sensory-impairments-in-hospitals-and-clinics-report.pdf)  
34 32 (accessed 06 December 2019). 2015.  
35 33 29. Chow CC, Kiernan DF, Chau FY, et al. Laser photocoagulation at birth  
36 34 prevents blindness in Norrie's disease diagnosed using amniocentesis.  
37 35 Ophthalmology 2010;117:2402-6.  
38 36 30. Redmond RM, Vaughan JI, Jay M, et al. In-Utero Diagnosis of Norrie  
39 37 Disease by Ultrasonography. Ophthalmic Paediatrics and Genetics  
40 38 1993;14:1-3.  
41 39 31. Wu LH, Chen L-H, Xie H, et al. Prenatal Diagnosis of a Case of Norrie  
42 40 Disease with Late Development of Bilateral Ocular Malformation. Fetal  
43 41 and Pediatric Pathology 2017;36:240-245.  
44 42 32. Dale NJ, Sakkalou E, O'Reilly MA, et al. Home-based early intervention  
45 43 in infants and young children with visual impairment using the  
46 44 Developmental Journal: longitudinal cohort study. Dev Med Child  
47 45 Neurol 2019;61:697-709.  
48 46 33. Callaway NF, Berrocal AM. Wnt-Spectrum Vitreoretinopathy  
49 47 Masquerading as Congenital Toxoplasmosis. Ophthalmic Surg Lasers  
50 48 Imaging Retina 2018;49:446-450.

- 1  
2  
3 1 34. Sims KB, Irvine AR, Good WV. Norrie disease in a family with a  
4 2 manifesting female carrier. Arch Ophthalmol 1997;115:517-9.  
5 3 35. Walsh MK, Drenser KA, Capone A, Jr., et al. Early vitrectomy effective  
6 4 for Norrie disease. Arch Ophthalmol 2010;128:456-60.  
7 5 36. Sisk RA, Hufnagel RB, Bandi S, et al. Planned Preterm Delivery and  
8 6 Treatment of Retinal Neovascularization in Norrie Disease.  
9 7 Ophthalmology 2014;121:1312-1313.  
10 8 37. Rehm HL, Zhang DS, Brown MC, et al. Vascular defects and  
11 9 sensorineural deafness in a mouse model of Norrie disease. J Neurosci  
12 10 2002;22:4286-92.  
13 11 38. Walker EA, Holte L, McCreery RW, et al. The Influence of Hearing Aid  
14 12 Use on Outcomes of Children With Mild Hearing Loss. Journal of  
15 13 Speech, Language, and Hearing Research 2015;58:1611-1625.  
16 14 39. Tribukait A, Brantberg K, Bergenius J. Function of semicircular canals,  
17 15 utricles and saccules in deaf children. Acta Otolaryngol 2004;124:41-8.  
18 16 40. Giagazoglou P, Amiridis IG, Zafeiridis A, et al. Static balance control  
19 17 and lower limb strength in blind and sighted women. Eur J Appl Physiol  
20 18 2009;107:571-9.  
21 19  
22  
23  
24  
25  
26  
27  
28  
29  
30  
31  
32  
33  
34  
35  
36  
37  
38  
39  
40  
41  
42  
43  
44  
45  
46  
47  
48  
49  
50  
51  
52  
53  
54  
55  
56  
57  
58  
59  
60

**1 TABLES AND FIGURES****2 Figure 1. Features and Management of Norrie Disease**

3 In addition to blindness and hearing loss, Norrie disease (ND) can present with a range of other  
4 neurological, psychological and systemic features (left), making this a complex disease. Due to its  
5 complexity, ND patients should have a multidisciplinary team involved in their care and development  
6 (right) in order to support all aspects of life and optimise their chance of success.  
7

**8 Figure 2. Patient and Caregiver Experiences: Burden of Dual Sensory****9 Impairment**

10 The burden of hearing loss in ND impacts many aspects of day-to-day life. Quotations were provided by  
11 the Norrie Disease Foundation. ND: Norrie Disease.  
12

**13 Figure 3. Norrie Disease Diagnostic Pathway**

14 At present, no guidelines or set routes for diagnosis of ND are available – this pathway represents a  
15 typical route for patients as observed in day-to-day clinical practice and is informed by the authoring  
16 clinicians. Referral to specialist developmental services should be made as soon as the child is assessed  
17 to be blind. Assessment by Audiology for subclinical hearing loss should also be performed as soon as  
18 possible after diagnosis, such that any losses can be managed quickly and appropriately. ND: Norrie  
19 Disease.  
20

**21 Figure 4. Advantages of Dual Sensory Clinics**

22 Advantages of Dual Sensory clinics, informed by published literature and quotations provided by the  
23 Norrie Disease Foundation.  
24

**25 Figure 5. Patient and Caregiver Experiences: Dual Sensory Clinics**

26 Quotations were provided by the Norrie Disease Foundation. ND: Norrie Disease.  
27  
28  
29  
30

1  
2  
3  
4  
5  
6  
7  
8  
9  
10  
11  
12  
13  
14  
15  
16  
17  
18  
19  
20  
21  
22  
23  
24  
25  
26  
27  
28  
29  
30  
31  
32  
33  
34  
35  
36  
37  
38  
39  
40  
41  
42  
43  
44  
45  
46  
47  
48  
49  
50  
51  
52  
53  
54  
55  
56  
57  
58  
59  
60

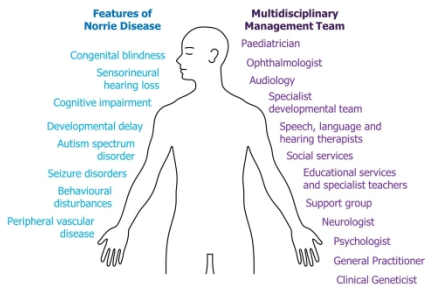

338x190mm (300 x 300 DPI)

1  
2  
3  
4  
5  
6  
7  
8  
9  
10  
11  
12  
13  
14  
15  
16  
17  
18  
19  
20  
21  
22  
23  
24  
25  
26  
27  
28  
29  
30  
31  
32  
33  
34  
35  
36  
37  
38  
39  
40  
41  
42  
43  
44  
45  
46  
47  
48  
49  
50  
51  
52  
53  
54  
55  
56  
57  
58  
59  
60

**Norrie Disease Voices: Burden of Disease**

**Box 1:** 'Having multisensory impairment has caused my son to have very complex additional needs, so much more than just blindness or hearing loss alone. When one accompanies the other, we feel the disability is far greater and much more difficult to overcome'  
*-Parent of a ND patient experiencing hearing loss*

**Box 3:** 'Over the years, as my hearing has deteriorated, I've found noisy environments more and more difficult. Even though I now use a hand-held microphone which I give to people I'm meeting with, going to restaurants makes me nervous.'  
*-Adult ND patient who first noticed hearing loss around age 10*

**Box 2:** 'I got two [hearing] aids around age 26... [I] still do and probably always will struggle in social situations.'  
*-Adult ND patient who first noticed hearing loss around age 11*

**Box 4:** 'Hearing aids are very expensive and no insurance pays for them... The aids do break... I keep old hearing aids so he has a back up to use when his hearing aids are being fixed.'  
*-Parent of a ND patient who began to use hearing aids at age 11*

**Box 5:** 'When [our son] is being taken care of by others we worry about the safety of the [hearing] aids. There have been a couple of times when my son has tossed the aids somewhere outside and they could not be found. They cost a great deal of money and insurance does not cover the full amount. Then there is the period when new [hearing] aids have to be made so my son has to be without [hearing] aids. We finally opted to have two pairs of aids at all times, which costs even more money.'  
*-Parent of a ND patient who's hearing loss was noticed at age 11 and has cognitive and behavioural symptoms*

338x190mm (300 x 300 DPI)



1  
2  
3  
4  
5  
6  
7  
8  
9  
10  
11  
12  
13  
14  
15  
16  
17  
18  
19  
20  
21  
22  
23  
24  
25  
26  
27  
28  
29  
30  
31  
32  
33  
34  
35  
36  
37  
38  
39  
40  
41  
42  
43  
44  
45  
46  
47  
48  
49  
50  
51  
52  
53  
54  
55  
56  
57  
58  
59  
60

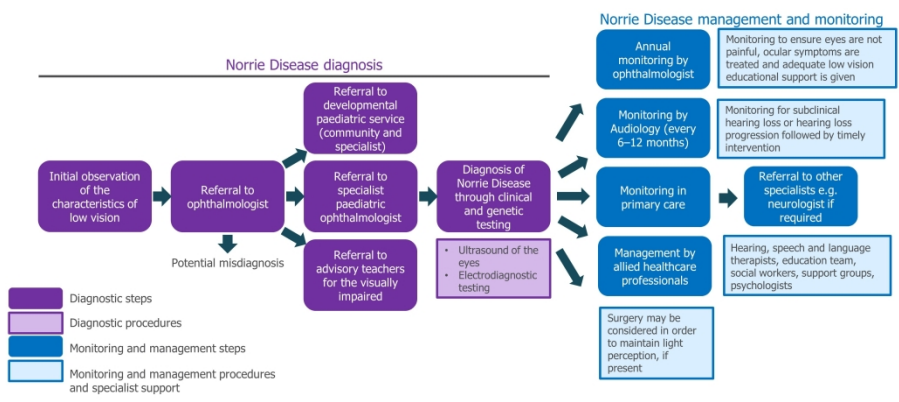

338x190mm (300 x 300 DPI)

**Multidisciplinary diagnostic facility**

- Appropriate communication with patients
- Awareness of rare sensory disorders
- Communication between specialists
- Collaboration and knowledge sharing between clinicians

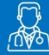**Appropriate environment**

- Working hearing loop
- Appropriate waiting and bathroom facilities
- Designed for children with complex sensory impairment disorders

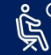**Convenience**

- Fewer trips to different clinics and specialists
- Most important tests performed at each visit

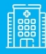**Early detection of problems**

- Monitor many disease elements in one visit
- Identification of new symptoms more quickly
- Referral to specialists within the same clinic

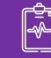

338x190mm (300 x 300 DPI)

1  
2  
3  
4  
5  
6  
7  
8  
9  
10  
11  
12  
13  
14  
15  
16  
17  
18  
19  
20  
21  
22  
23  
24  
25  
26  
27  
28  
29  
30  
31  
32  
33  
34  
35  
36  
37  
38  
39  
40  
41  
42  
43  
44  
45  
46  
47  
48  
49  
50  
51  
52  
53  
54  
55  
56  
57  
58  
59  
60

**Norrie Disease Voices: Dual Sensory Clinic Experiences**

|                                                                                                                                                                                                                                                                                                                                                                                                                                     |                                                                                                                                                                                                                                                                                                                                |
|-------------------------------------------------------------------------------------------------------------------------------------------------------------------------------------------------------------------------------------------------------------------------------------------------------------------------------------------------------------------------------------------------------------------------------------|--------------------------------------------------------------------------------------------------------------------------------------------------------------------------------------------------------------------------------------------------------------------------------------------------------------------------------|
| <p><b>Box 1:</b> 'The clinic was very good and the staff very friendly and helpful. It was a very trying day for us all due to all the tests and the journey too but beneficial to do them all in one go.'</p> <p><i>-Parent of a ND patient</i></p>                                                                                                                                                                                | <p><b>Box 3:</b> 'We find attending the combined appointments much more manageable. The doctors had a wider understanding of how dual sensory loss affects every aspect of [my son's] life, including communication and mobility, and that some tests just wouldn't be appropriate.'</p> <p><i>-Parent of a ND patient</i></p> |
| <p><b>Box 2:</b> 'All the staff at the hospital that dealt with [my son] were friendly, professional and explained what was happening. Seeing [ophthalmologist] at the clinic was a particularly good experience, he took time to explain everything to [my son] and it was a relief to be seen by someone who has knowledge of Norrie Disease.'</p> <p><i>-Parent of a ND patient</i></p>                                          | <p><b>Box 4:</b> 'It is such a time saver to be seen on one day for two appointments which helps so much in terms of cutting down on childcare [for my other child]; travel expenses; time missed at school for the patient and work days missed for the parents.'</p> <p><i>-Parent of a ND patient</i></p>                   |
| <p><b>Box 5:</b> 'The appointment was very relaxed and [my son] felt comfortable with the environment he was in... The staff were brilliant with [my son]. Because of his developmental delays, he doesn't understand what is happening and can get quite distressed with clinic appointments. They all took time to make [my son] feel comfortable before trying to complete the tests.'</p> <p><i>-Parent of a ND patient</i></p> |                                                                                                                                                                                                                                                                                                                                |

338x190mm (300 x 300 DPI)

# BMJ Paediatrics Open

## The Impact of Sight and Hearing Loss in Patients with Norrie Disease: Advantages of Dual Sensory Clinics in Patient Care

|                               |                                                                                                                                                                                                                                                                                                                                                                                                                                                       |
|-------------------------------|-------------------------------------------------------------------------------------------------------------------------------------------------------------------------------------------------------------------------------------------------------------------------------------------------------------------------------------------------------------------------------------------------------------------------------------------------------|
| Journal:                      | <i>BMJ Paediatrics Open</i>                                                                                                                                                                                                                                                                                                                                                                                                                           |
| Manuscript ID                 | bmjpo-2020-000781.R1                                                                                                                                                                                                                                                                                                                                                                                                                                  |
| Article Type:                 | Review                                                                                                                                                                                                                                                                                                                                                                                                                                                |
| Date Submitted by the Author: | 30-Sep-2020                                                                                                                                                                                                                                                                                                                                                                                                                                           |
| Complete List of Authors:     | Sowden, Jane; UCL Great Ormond Street Institute of Child Health Library, Developmental Biology and Cancer Department<br>Kros, Corné; University of Sussex<br>Sirimanna, Tony; Great Ormond Street Hospital for Children<br>Pagarkar, Waheeda; Great Ormond Street Hospital for Children<br>Oluonye, Ngozi; Great Ormond Street Hospital for Children, Wolfson Neurodisability Service<br>Henderson, Robert; Great Ormond Street Hospital for Children |
| Keywords:                     | Audiology, Ophthalmology, Deafness                                                                                                                                                                                                                                                                                                                                                                                                                    |
|                               |                                                                                                                                                                                                                                                                                                                                                                                                                                                       |

SCHOLARONE™  
Manuscripts



I, the Submitting Author has the right to grant and does grant on behalf of all authors of the Work (as defined in the below author licence), an exclusive licence and/or a non-exclusive licence for contributions from authors who are: i) UK Crown employees; ii) where BMJ has agreed a CC-BY licence shall apply, and/or iii) in accordance with the terms applicable for US Federal Government officers or employees acting as part of their official duties; on a worldwide, perpetual, irrevocable, royalty-free basis to BMJ Publishing Group Ltd ("BMJ") its licensees and where the relevant Journal is co-owned by BMJ to the co-owners of the Journal, to publish the Work in this journal and any other BMJ products and to exploit all rights, as set out in our [licence](#).

The Submitting Author accepts and understands that any supply made under these terms is made by BMJ to the Submitting Author unless you are acting as an employee on behalf of your employer or a postgraduate student of an affiliated institution which is paying any applicable article publishing charge ("APC") for Open Access articles. Where the Submitting Author wishes to make the Work available on an Open Access basis (and intends to pay the relevant APC), the terms of reuse of such Open Access shall be governed by a Creative Commons licence – details of these licences and which [Creative Commons](#) licence will apply to this Work are set out in our licence referred to above.

Other than as permitted in any relevant BMJ Author's Self Archiving Policies, I confirm this Work has not been accepted for publication elsewhere, is not being considered for publication elsewhere and does not duplicate material already published. I confirm all authors consent to publication of this Work and authorise the granting of this licence.

Revised Version - ND Dual Sensory Clinics

29 September 2020

1  
2  
3  
4  
5  
6  
7  
8  
9  
10  
11  
12  
13  
14  
15  
16  
17  
18  
19  
20  
21  
22  
23  
24  
25  
26  
27  
28  
29  
30  
31  
32  
33  
34  
35  
36  
37  
38  
39  
40  
41  
42  
43  
44  
45  
46  
47  
48  
49  
50  
51  
52  
53  
54  
55  
56  
57  
58  
59  
60

1 **The Impact of Sight and Hearing Loss in Patients with Norrie**  
2 **Disease: Advantages of Dual Sensory Clinics in Patient Care**

3  
4 Jane C Sowden<sup>1</sup>, Corné J Kros<sup>2</sup>, Tony Sirimanna<sup>3</sup>, Waheeda Pagarkar<sup>3</sup>, Ngozi  
5 Oluonye<sup>4</sup>, Robert H Henderson<sup>3</sup>

6 <sup>1</sup>Developmental Biology and Cancer Department, UCL Great Ormond Street  
7 Institute of Child Health, 30 Guilford Street, London WC1N 1EH, United  
8 Kingdom.

9 <sup>2</sup>School of Life Sciences, University of Sussex, Falmer, Brighton BN1 9QG,  
10 United Kingdom.

11 <sup>3</sup>Great Ormond Street Hospital, Great Ormond Street, London, WC1N 3JH,  
12 United Kingdom.

13 <sup>4</sup>Wolfson Neurodisability Service, Great Ormond Street Hospital, Great  
14 Ormond Street, London, WC1N 3JH, United Kingdom

15 **Correspondence to:** Professor Jane Sowden  
16 Developmental Biology and Cancer Department  
17 UCL Great Ormond Street Institute of Child Health  
18 30 Guilford Street  
19 London  
20 WC1N 1EH  
21 [j.sowden@ucl.ac.uk](mailto:j.sowden@ucl.ac.uk), +44 20 7905 2121

22 **Short title:** Norrie Disease and Dual Sensory Clinics Manuscript

23 **Key words:** Audiology, Deafness, Ophthalmology

24 **Abstract word count:** 286

25 **Word count:** 3,454  
26

**Abstract**

Norrie Disease (ND) is a rare, X-linked condition of visual and auditory impairment, often presenting with additional neurological features and developmental delays of varying severity. While all affected patients are born blind, or lose their vision in infancy, progressive sensorineural hearing loss develops in the majority of cases and is typically detected in the second decade of life. A range of additional symptoms of ND, such as seizure disorders, typically appear from a young age, but it is difficult to predict the range of symptoms ND patients will experience. After growing up without vision, hearing loss represents the greatest worry for many ND patients, as they may lose the ability to participate in previously enjoyed activities or to communicate with others.

Dual sensory loss has a physical, psychosocial and financial impact on both ND patients and their families. Routine monitoring of the condition is required in order to identify, treat, and provide support for emerging health problems, leading to a large burden of medical appointments. Many patients need to travel long distances to meet with specialists, representing a further burden on time and finances. Additionally, the rare nature of dual sensory impairment in children means that few clinical environments are designed to meet their needs. Dual Sensory clinics are multidisciplinary environments designed for sensory-impaired children and have been suggested to alleviate the impact of diseases involving sensory loss such as ND.

Here, we discuss the diagnosis, monitoring and management of ND and the impact it has on paediatric patients and their caregivers. We describe the potential for Dual Sensory clinics to reduce disease burden through providing an appropriate clinical environment, access to multiple clinical experts in one visit, and ease of monitoring for ND patients.

## 1 Key Messages

What is known about Norrie Disease (ND)?

- ND is a rare condition of congenital or infantile blindness. In addition, the majority of ND patients experience progressive sensorineural hearing loss.
- Dual sensory loss has a significant impact on ND patients and is associated with communication problems, additional educational needs and feelings of isolation.
- Patients with ND require management and monitoring by a range of clinicians and specialists to help them reach their full potential.

What does this review add?

- It is proposed that Dual Sensory clinics would alleviate the impact of ND by providing coordinated care by clinical specialists familiar with the disease.
- Care by clinicians aware of the needs of ND patients improves the patient experience and can ensure timely and appropriate intervention for hearing loss.
- Clinics designed with the needs of sensory impaired children in mind, and with staff trained in effective communication skills, can alleviate the stress of appointments.

2



## 1 INTRODUCTION

2 Norrie Disease (ND; OMIM 310600, **Figure 1**) is a rare condition with over  
3 400 cases described, but its prevalence and incidence is unknown.<sup>1</sup> ND is  
4 caused by mutations in the Norrie disease pseudoglioma (*NDP*) gene, located  
5 on the X chromosome, therefore the vast majority of patients are male. ND is  
6 the most severe of a spectrum of vitreoretinopathies including familial  
7 exudative vitreoretinopathy (FEVR), retinopathy of prematurity (ROP) and  
8 Coat's Disease.<sup>2</sup>

9 Patients with ND typically present with congenital or infantile blindness;<sup>3</sup> the  
10 majority are blind from birth. Ocular signs of the disease are present at birth  
11 or develop during early infancy, with clinical examination of the eye often  
12 revealing microphthalmia (abnormally small eyes), corneal opacity, vitreous  
13 haemorrhage (leakage of blood into the eye), cataracts, dysplastic retinal  
14 tissue and retinal detachment.<sup>2</sup> Parents may notice a white reflex in their  
15 child's pupils, or that their child fails to respond to light.<sup>4-6</sup>

16 Most ND patients will pass their newborn hearing screen but the majority will  
17 experience progressive sensorineural hearing loss.<sup>7</sup> Early hearing loss can be  
18 asymptomatic, with initial loss of high frequencies progressing to severe  
19 symmetric hearing loss, typically by 35 years of age.<sup>7, 8</sup> Patients consistently  
20 report intermittent hearing loss with slow deterioration over time, tinnitus and  
21 periods of 'stiffness',<sup>7</sup> though speech discrimination is usually well  
22 preserved.<sup>8, 9</sup> Of those with hearing loss, most experience its onset by their  
23 mid-20s, with one study reporting the median age of onset was 12 years.<sup>7</sup>  
24 Referral of ND patients to audiology after diagnosis is important as regular  
25 monitoring allows early intervention from the onset of impairment.

26 In addition to dual sensory loss, ND is associated with cognitive impairment,  
27 neurodevelopmental disorders (e.g. autism spectrum disorder [ASD]),  
28 peripheral vascular disease (PVD) and seizure disorders,<sup>7, 10-13</sup> with one study  
29 of 56 patients reporting cognitive impairment in 28%, ASD in 27%, PVD in  
30 38% and seizure disorders in approximately 10% of patients.<sup>7</sup> The

1 presentation of ND, even within families carrying identical *NDP* mutations, can  
2 be extremely variable.<sup>14, 15</sup> This variability may be due to environmental,  
3 genetic or epigenetic factors, and in some cases both partially sighted and  
4 blind individuals have been found to carry the same mutation.<sup>15</sup>

5 The multifaceted nature of ND, and the presence of dual sensory  
6 impairments, has a major impact on both patients and caregivers. Few clinical  
7 environments are suitably adapted for children with dual sensory  
8 impairments. Similarly, diagnosis and long-term monitoring of ND requires  
9 repeat visits to specialist clinicians with knowledge of the best testing  
10 methods and interventions. This suggests that a holistic approach to care  
11 involving the review of ocular and extraocular symptoms simultaneously  
12 would be beneficial to ND patients. Additionally, a multidisciplinary team,  
13 including psychologists and social workers, should be included in patient care  
14 to help maximise patient outcomes.

15 Dual Sensory clinics have been suggested to improve the clinical experience  
16 of children with sensory impairments. These clinics are designed to  
17 accommodate the needs of sensory impaired children while providing access  
18 to multiple clinicians in one visit. This reduces the stress and burden  
19 associated with numerous, separate medical appointments and optimises  
20 communication between professionals. Here, we discuss the challenges  
21 experienced by ND patients, the current clinical approaches for ND  
22 management and the potential advantages of Dual Sensory clinics for this  
23 complex disease.

#### 24 **Impact of Norrie Disease**

25 Dual sensory loss is characterised by impairment in two sensory modalities –  
26 in ND these are hearing and vision. Sensorineural hearing loss may occur at a  
27 young age in ND patients, highlighting the need for early intervention. Dual  
28 sensory loss represents a number of challenges for both the affected patient  
29 and their caregivers (**Figure 2; Box 1**). These include communication

1  
2  
3 1 problems, additional educational needs, and feelings of isolation. Patients with  
4  
5 2 ND are not thought to experience significant hearing loss before language  
6  
7 3 acquisition<sup>7</sup> but developing communication abilities remains a concern.  
8  
9

#### 4 ***Physical and Psychosocial Impact***

##### 5 *Visual Impairment*

6 Visual impairment represents the most immediate concern in ND, and  
7  
8 caregivers must adapt to the needs of a blind child in both family and  
9  
10 educational environments. Visually impaired children may have problems  
11  
12 establishing and maintaining sleep/wake routines.<sup>16</sup> Sleep disorders have  
13  
14 been noted in some ND case reports<sup>17</sup> and can have serious effects on mood,  
15  
16 behaviour, and ability to learn, as well as placing stress on the patient's  
17  
18 family.<sup>16</sup>

19 Visual impairment has a significant impact on early child development, with  
20  
21 many skills (including sitting, crawling, walking and sound localisation)  
22  
23 emerging later than in fully sighted children. Developmental regression has  
24  
25 been reported in ND patients,<sup>18</sup> while developmental delays and social  
26  
27 communication difficulties can affect children with profound visual  
28  
29 impairments.<sup>19, 20</sup>

30 Language skills are often delayed and may develop atypically in visually  
31  
32 impaired children. ND patients may take longer to both understand and use  
33  
34 language and have difficulties with social communication; however, there is  
35  
36 limited evidence regarding the impact of sensory loss in ND patients and their  
37  
38 ability to build and maintain relationships. Communication with sighted  
39  
40 children may be difficult as the ND patient cannot see the non-verbal  
41  
42 communication or body language of their peers, which are important  
43  
44 contributors to social interactions. Difficulty in communication and play may  
45  
46 lead to feelings of isolation and being different to peers, which may contribute  
47  
48 to the mental health vulnerabilities recognised in visually impaired children.<sup>21</sup>  
49  
50  
51  
52  
53  
54  
55  
56  
57  
58  
59  
60

1 In addition to the impact on development, visual impairment represents a  
2 significant barrier to teaching independence skills such as toileting,  
3 navigation, cooking and eating. As ND patients grow older, the cosmetic  
4 impact of eye shrinkage may become a concern, and should be monitored by  
5 the clinical team.

### 6 *Dual Sensory Loss*

7 Developing independence skills as a blind individual often involves using  
8 auditory cues.<sup>21, 22</sup> Progressive hearing loss may further complicate ND  
9 patients' day-to-day life by negating previously developed mechanisms for life  
10 without vision. Consequently, blind and hard of hearing people need optimum  
11 binaural amplification (coordinated amplification between both ears) to ensure  
12 optimal hearing, and localisation of sound (including speech), in every  
13 listening environment. Additionally, this amplification may be required at a  
14 higher level of hearing than in a sighted person, as mild hearing losses can  
15 have a more substantial impact on blind patients. Audiology professionals  
16 should be aware of the hearing aid requirements to achieve these  
17 amplification needs for their ND patients.<sup>22, 23</sup> Similarly, the impacts of hearing  
18 loss are exacerbated by blindness. ND patients with dual sensory impairment  
19 cannot use strategies for improving speech discernment and communication  
20 such as sign language through visual means and lip reading.

21 Despite dual sensory loss, ND patients exhibit a high degree of independence,  
22 with one study reporting that of 32 patients aged  $\geq 18$  years, 75% had lived  
23 or were living independently;<sup>7</sup> however, independence remains a concern as  
24 hearing loss progresses. For ND patients with more severe neurological and  
25 cognitive features, independence may never be possible, placing a long-term  
26 psychosocial and care burden on their families.<sup>24</sup>

27 Dual sensory loss can be isolating and may discourage patients from  
28 participating in activities they previously enjoyed. A lack of awareness of  
29 effective communication methods among the general public may increase

1 these social barriers for patients (**Figure 2; Box 2**). Hearing loss may be  
2 particularly challenging in social environments such as parties or restaurants  
3 which have high levels of background noise (**Figure 2; Box 3**).

4 Progressive hearing loss also increases the psychological impact of ND on  
5 patients. Transient depression, directly related to the onset of hearing loss,  
6 was reported by the majority of cognitively able ND patients included in a  
7 study of clinical histories and genotype data.<sup>7</sup> A further case study described  
8 how a patient withdrew from society as his hearing deteriorated.<sup>25</sup> These  
9 findings highlight the psychological impact of hearing loss and the need for  
10 ND patients to receive early, proactive, clinical and emotional support.

### 11 ***Financial Impact***

12 ND patients have many medical appointments to attend, often with specialists  
13 or at clinics that are not local to them, resulting in substantial travel costs.  
14 Further costs may be incurred for childcare, or loss of earnings may result  
15 from parents of patients with ND having to miss days from work.

16 Hearing aids may be prescribed to patients with hearing loss, however, the  
17 assistive devices provided by health and education services (free of charge in  
18 the UK) or medical insurance may not be of sufficient quality or the most  
19 appropriate for the patients' requirements. This can represent a substantial  
20 financial burden to families (**Figure 2; Boxes 4 and 5**), especially if spare  
21 pairs of hearing aids are required to cover loss or repair.

### 22 ***Day-to-Day Support***

23 It is important that clinicians understand the most appropriate ways to  
24 interact with blind and hearing impaired paediatric patients.<sup>26</sup> Clinicians may  
25 be unaware of the best approach to inform patients of what is happening  
26 during their appointment, such as explaining when they are writing notes or  
27 preparing equipment. Clinicians may also find it difficult to communicate how  
28 a patient should position themselves for a test, and may instead resort to

1 manipulating the patient themselves.<sup>26</sup> Parents often assist with the  
2 explanation and coordination between clinicians and their child,<sup>26</sup> which is  
3 important if the clinician is less familiar with the disease.

#### 4 **Current Clinical Approach**

##### 5 ***Diagnosis***

6 Diagnosis of ND can be a lengthy process (**Figure 3**). Initially, referral to an  
7 ophthalmologist is made upon observation of nystagmus (rapid, involuntary  
8 eye movements), leukocoria (abnormal white reflection from the retina) or a  
9 failure of the infant to fix their gaze and follow movement. Due to the rarity  
10 of the condition, appropriate referral and diagnosis may be delayed, and  
11 misdiagnoses (e.g. of glaucoma, congenital cataract, or retinoblastoma) can  
12 occur. Most patients will eventually be referred to a specialist paediatric  
13 ophthalmologist, where they will be fully diagnosed by a combination of  
14 ophthalmic examination and investigation including B-mode ultrasound and  
15 subsequent genetic testing.

16 Though not routine, it is possible to identify ND *in utero* if the mother is a  
17 suspected or known carrier of the disease. Amniocentesis or chorionic villus  
18 sampling with genetic testing can be used to identify pathogenic *NDP* variants  
19 and determine the sex of a fetus,<sup>27, 28</sup> while early signs of ocular pathology  
20 can be detected using ultrasound.<sup>29, 30</sup> Alternatively, pre-implantation genetic  
21 diagnosis can be used to screen embryos derived from *in vitro* fertilisation to  
22 reduce the risk that a child inherits a pathogenic copy of *NDP*.<sup>31</sup>

##### 23 ***Management***

24 Management of patients with ND requires input from a team of specialists and  
25 allied healthcare professionals (**Figure 1**), including hearing, speech and  
26 language therapists, an education team (including qualified teachers for the  
27 hearing impaired, visually impaired and the deaf-blind), social workers,  
28 support groups, psychologists and developmental specialists. This ensures ND  
29 patients receive the support they need to maximise their potential. At the

1  
2  
3 1 clinician's discretion, surgical interventions may be offered to paediatric ND  
4 2 patients in an attempt to preserve light perception (**Figure 4**); however,  
5 3 published case studies demonstrate variable results and the long-term benefit  
6 4 is unclear.<sup>6, 7, 27, 32-34</sup> These outcomes must be weighed against the risks  
7 5 associated with surgery (infection, bleeding and glaucoma), which may result  
8 6 in eye pain and the need for enucleation. In two cases, retinal attachment  
9 7 and some visual acuity was preserved following surgical intervention after *in*  
10 8 *utero* diagnosis and premature delivery.<sup>27, 35</sup>

11 9 As soon as blindness is detected in an infant they should be referred to a  
12 10 specialist developmental paediatrician with the expertise and resources to  
13 11 assess developmental issues as they arise (**Figure 3**). Work with a team of  
14 12 developmental specialists should begin as early as possible to minimise the  
15 13 impact of visual impairment on the patient; the intervention, support and  
16 14 advice of developmental specialists is essential to guide parents in how to  
17 15 assist their child in all areas of development.<sup>36</sup>

18 16 After the detection of hearing impairment, clinicians will consider how best to  
19 17 manage dual sensory loss. Hearing aids are a common intervention for ND  
20 18 patients<sup>2, 9</sup> and treating audiology professionals should have a good  
21 19 knowledge of the range of hearing aids available (including those not  
22 20 accessible through the patient's health service or medical insurance) in order  
23 21 to suggest the most appropriate devices. In particular, clinicians should be  
24 22 aware of the benefits of intervention for even mild hearing losses in blind  
25 23 patients. As hearing loss is progressive in ND, periodic and proactive hearing  
26 24 aid upgrades and the provision of assistive hearing devices may be required  
27 25 to ensure optimal amplification for patients. Clinicians should be familiar with  
28 26 the cochlear implants and vibro-tactile aids available for their ND patients.  
29 27 Some ND patients use cochlear implants, and have reported positive impacts  
30 28 on their quality of life.<sup>7, 25</sup>



## 1 **Monitoring**

2 Routine monitoring of ND patients is important for identifying the onset of  
3 developmental delays and hearing loss (**Figure 4**). Monitoring of the eyes  
4 should also be conducted to ensure they are not causing pain and, in patients  
5 with no light perception, consideration should be given to the fitting of scleral  
6 shells both for improved cosmesis and to promote midfacial growth.

7 There are no guidelines for monitoring hearing loss in ND – currently, hearing  
8 difficulties observed by caregivers typically trigger a referral for assessment. A  
9 mouse model of ND shows early changes in the blood vessels of the cochlear  
10 (stria vascularis),<sup>37</sup> and cochlear dysfunction is believed to occur before  
11 hearing loss can be detected using conventional techniques. Careful clinical  
12 monitoring for early diagnosis and intervention is necessary (**Figure 4**), as  
13 mild, high-frequency hearing loss is often not detected by caregivers. Hearing  
14 is extremely important for blind children, and even subclinical losses can have  
15 an impact on their developmental trajectory. Early referral to audiology  
16 specialists is recommended to allow for monitoring with appropriate  
17 behavioural or objective tests such as otoacoustic emissions (sounds  
18 generated by the outer hair cells within the inner ear) for the early detection  
19 of cochlear dysfunction. Proactive early intervention can help improve speech  
20 and language development in children with mild hearing loss.<sup>38</sup>

21 Though reduced vestibular function is commonly associated with  
22 sensorineural hearing loss,<sup>39</sup> it is not known whether the vestibular system is  
23 affected by ND. The vestibular system is important for postural stability in the  
24 absence of visual cues<sup>40</sup> and so its function should be assessed in ND  
25 patients.

## 26 **Advantages of Dual Sensory Clinics**

27 Dual Sensory clinics have been proposed as a way of reducing the impact of  
28 complex sensory disorders on patients (**Figure 5, Figure 6**) and may provide  
29 wide ranging benefits to patients and clinicians. Beyond ND, multidisciplinary  
30



1 care is known to be beneficial for patients with a wide range of conditions  
2 which feature dual sensory loss, such as Usher syndrome and CHARGE  
3 syndrome.

#### 4 ***Multidisciplinary Diagnostic Facility***

5 Within the environment of a Dual Sensory clinic, clinicians are trained in best  
6 communication practices for patients with sensory impairments. Appropriate  
7 communication, and provision of information in accessible formats (e.g.  
8 Braille) positively impacts sensory impaired children (**Figure 6; Boxes 2 and**  
9 **5**) and ensures that hospital staff address ND patients, rather than their  
10 caregivers. Effective communication is important during consultations and  
11 may involve allowing ND patients to handle devices (e.g. hearing aids,  
12 cochlear implant processors) or explaining test results appropriately.<sup>26</sup> These  
13 appropriate communication techniques allow patients to understand the  
14 procedures they may receive, helps them feel included and informed in their  
15 care decisions and may reduce stress.<sup>26</sup> Communication between clinicians  
16 regarding patient needs and care may be improved by bringing them together  
17 in a multidisciplinary environment, so improving patient experiences.<sup>26</sup>

18 Hearing assessments are often challenging and time consuming in patients  
19 with ND, due to their blindness. Some hearing tests utilise visual cues so  
20 require adaption for ND patients and some CHARGE patients. If reliable  
21 results are not obtained, a hearing test under general anaesthetic must be  
22 considered. Hearing monitoring requires highly experienced staff, who are  
23 aware of the needs of ND patients, ensuring patients' comfort and  
24 understanding of the procedures.

25 In addition to training and communication, a multidisciplinary environment  
26 can promote collaboration and knowledge sharing between clinical experts. A  
27 network of such clinics could foster broader collaboration and opportunities  
28 for clinicians to discuss patient cases with a wider selection of their peers –

1  
2  
3 1 this interaction may improve a clinician's understanding of complex sensory  
4  
5 2 disorders.

### 3 ***Convenience***

4 In the UK, research into the experiences of patients with rare diseases and  
5 sensory impairments has revealed that for complex diseases like CHARGE and  
6 Usher syndromes, care can be uncoordinated and spread across numerous  
7 clinics and hospitals.<sup>26</sup> Dual Sensory clinics allow patients to be reviewed by  
8 multiple specialist clinicians in one visit, reducing the overall number of  
9 hospital visits they need to attend. This may reduce stress, particularly for  
10 patients with additional features such as ASD. Reductions in the time spent  
11 travelling to and attending appointments can also reduce absences from  
12 school for patients, and from the workplace for their parents (**Figure 6; Box**  
13 **4**).

14 In the Netherlands, the National Multidisciplinary CHARGE Clinic coordinates  
15 care for children and young adults with CHARGE syndrome and provides  
16 access to a wide range of clinicians, including a specialist communication and  
17 language development team; patients attend every one to two years.<sup>41</sup>

### 18 ***Appropriate Environment***

19 Many hospital environments are not designed with sensory impaired  
20 paediatric patients in mind; this has been reported by both CHARGE and  
21 Usher syndrome patients in the UK.<sup>26</sup> Dual Sensory clinics aim to provide  
22 comfortable, accessible and functional environments for sensory impaired  
23 patients. This includes providing appropriate facilities close to waiting rooms,  
24 and ensuring that the waiting room and reception area have working hearing  
25 loops.<sup>26</sup> Entertainment specifically for sensory impaired children, such as  
26 books in Braille and multisensory toys for children of all ages, positively  
27 impacts the waiting experience.<sup>26</sup> Sensory impaired children may have a  
28 preference for, or greater sensitivity to, their sense of touch and smell. A Dual

1  
2  
3 1 Sensory clinic may be able to consider this in its design, helping to provide an  
4  
5 2 environment better suited to patients' needs (**Figure 6; Box 2**).<sup>26</sup>  
6  
7

### 8 3 ***Early Detection of Health Problems***

9  
10  
11 4 Access to a range of clinicians with specialist disease knowledge increases the  
12  
13 5 chances that health issues are identified more quickly, allowing timely  
14  
15 6 provision of appropriate interventions. Parents have reported that delayed  
16  
17 7 diagnoses contribute to anxiety and stress;<sup>9</sup> the ease of monitoring health  
18  
19 8 conditions in a Dual Sensory or multidisciplinary clinic may help to alleviate  
20  
21 9 this.  
22

### 23 10 ***Ongoing Challenges***

24  
25  
26 11 Despite the advantages of offering many different services at one  
27  
28 12 appointment, careful consideration needs to be taken when dealing with very  
29  
30 13 young or developmentally delayed children who may struggle with medical  
31  
32 14 procedures. Clinicians must decide which tests need to be performed most  
33  
34 15 urgently so as not to overburden the patient during their visit. In particular,  
35  
36 16 balance tests and ophthalmic examinations with dilating drops (which sting  
37  
38 17 the eyes and can be very uncomfortable) are unpleasant for the patient,  
39  
40 18 leading to discomfort, tiredness and poor compliance with subsequent tests.  
41  
42 19 Further challenges may be experienced by a minority of ND patients who  
43  
44 20 have some visual function, as dilating drops may further compromise their  
45  
46 21 access to visual cues for communication.

47  
48 22 For many patients with rare, multisensory diseases an ongoing challenge is  
49  
50 23 accessing services tailored to their condition. While the opening of new,  
51  
52 24 specialist clinics represents an advance in care for such children, these are  
53  
54 25 often concentrated in large cities. This small number of clinics and their  
55  
56 26 limited locations can still present issues of travel time and costs for ND  
57  
58 27 patients and their families.  
59  
60

1 The transition from paediatric to adult services is another challenge for  
2 patients with rare conditions; however, awareness of this issue is increasing.  
3 It has been suggested that transition planning should begin from 12–14 years  
4 of age, should cover a broad range of the patient's care needs and should  
5 involve a coordinating care provider.<sup>42</sup> Dual Sensory and multidisciplinary  
6 clinics may be of help to facilitate this transition process by ensuring that any  
7 changes to care are planned early and are coordinated between teams to  
8 avoid disruption to care and distress to the patient.<sup>42</sup>

### 9 **Summary**

10 ND is a complex, multifaceted disease of dual sensory impairment that has a  
11 significant impact on patients and caregivers. While congenital blindness  
12 presents challenges for communication, development and adaptation to the  
13 sighted world, development of progressive hearing loss adds to the risk of  
14 isolation and psychosocial impact. Early intervention to provide developmental  
15 support and identify subclinical hearing loss is necessary to ensure ND  
16 patients can reach their full potential. The complex nature of ND means  
17 patients may attend many medical appointments, resulting in absence from  
18 school and their caregivers taking time away from work. Additional cost  
19 implications may result from the need for specialist equipment and hearing  
20 interventions.

21 Many hospital environments are not suited for children with multiple  
22 disabilities and clinicians may be unfamiliar with the best communication  
23 practices for interacting with such patients. Provision of Dual Sensory clinics  
24 may optimise patient care and experience while streamlining visits to reduce  
25 the necessary absence from school, work or social activities. Coordinated  
26 multidisciplinary clinics specifically designed to cater to the needs of patients  
27 with sensory impairments would be of great benefit to patients with a wide  
28 range of complex rare diseases involving vision and hearing loss, including  
29 ND.

## 1 **ACKNOWLEDGEMENTS**

2 The authors would especially like to thank the Norrie Disease families and  
3 patients who provided quotes about their experience of the disease. The  
4 authors thank Dr Aara Patel and Valda Pauzuolyte, UCL Great Ormond Street  
5 Institute of Child Health, London, for reviewing and critiquing the manuscript.  
6 The authors also acknowledge Wendy Horrobin, The Norrie Disease  
7 Foundation, London, for publication coordination and Katherine Massey, PhD,  
8 and Sarah Jayne Clements, PhD, from Costello Medical, UK, for medical  
9 writing and editorial assistance based on the authors' input and direction. This  
10 publication was developed free-of-charge on a *pro bono* basis by Costello  
11 Medical.

## 12 **FUNDING**

13 Third-party writing assistance for this article, provided by Katherine Massey,  
14 PhD, and Sarah Jayne Clements, PhD, Costello Medical, UK, was provided by  
15 Costello Medical free-of-charge on a *pro bono* basis in accordance with Good  
16 Publication Practice (GPP3) guidelines (<http://www.ismpp.org/gpp3>).

17 JCS is supported by the National Institute for Health Research (NIHR) Great  
18 Ormond Street Hospital Biomedical Research Centre and the Great Ormond  
19 Street Hospital Children's Charity and is an NIHR Senior Investigator. The  
20 views expressed are those of the authors and not necessarily those of the  
21 NHS, the NIHR or the Department of Health.

## 22 **AUTHORS' CONTRIBUTIONS**

23 Drafting the article or revising it critically for important intellectual content:  
24 JCS, RHH, CJK, TS, WP, NO; final approval of the version of the article to be  
25 published: JCS, RHH, CJK, TS, WP, NO. Responsibility for opinions,  
26 conclusions and interpretation of clinical evidence, and the submitted draft,  
27 lies with the authors.

## 28 **DISCLOSURES**

Revised Version - ND Dual Sensory Clinics

29 September 2020

1 JCS: None declared; RHH: Received fees for advisory board attendance from  
2 Novartis, DORC and Alcon; none are relevant to this article or subject; CJK:  
3 None declared; TS: None declared; WP: None declared; NO: None declared.

4

Confidential: For Review Only

**REFERENCES**

1. Sims K. Norrie disease. Available at [https://www.orpha.net/consor/cgi-bin/OC\\_Exp.php?Lng=EN&Expert=649](https://www.orpha.net/consor/cgi-bin/OC_Exp.php?Lng=EN&Expert=649) (accessed 06 December 2019). Orphanet Encyclopedia.
2. Sims KB. NDP-Related Retinopathies. In: Adam MP, Ardinger HH, Pagon RA, Wallace SE, Bean LJH, Stephens K, Amemiya A, eds. GeneReviews((R)). Seattle (WA): University of Washington, Seattle. GeneReviews is a registered trademark of the University of Washington, Seattle. All rights reserved., 1993.
3. Norrie G. Causes of Blindness in Children. *Acta Ophthalmologica* 1927;5:357-386.
4. Saini JS, Sharma A, Pillai P, et al. Norries disease. *Indian J Ophthalmol* 1992;40:24-6.
5. Sukumaran K. Bilateral Norrie's disease in identical twins. *Br J Ophthalmol* 1991;75:179-80.
6. Zhang XY, Jiang WY, Chen LM, et al. A novel Norrie disease pseudoglioma gene mutation, c.-1\_2delAAT, responsible for Norrie disease in a Chinese family. *Int J Ophthalmol* 2013;6:739-43.
7. Smith SE, Mullen TE, Graham D, et al. Norrie disease: Extraocular clinical manifestations in 56 patients. *American Journal of Medical Genetics Part A* 2012;158A:1909-1917.
8. Halpin C, Owen G, Gutierrez-Espeleta GA, et al. Audiologic features of Norrie disease. *Ann Otol Rhinol Laryngol* 2005;114:533-8.
9. Halpin C, Sims K. Twenty years of audiology in a patient with Norrie disease. *Int J Pediatr Otorhinolaryngol* 2008;72:1705-10.
10. Blodi FC, Hunter WS. Norrie's disease in North America. *Doc Ophthalmol* 1969;26:434-50.
11. Michaelides M, Luthert PJ, Cooling R, et al. Norrie disease and peripheral venous insufficiency. *Br J Ophthalmol* 2004;88:1475.
12. Okumura A, Arai E, Kitamura Y, et al. Epilepsy phenotypes in siblings with Norrie disease. *Brain Dev* 2015;37:978-82.
13. Yamada K, Limprasert P, Ratanasukon M, et al. Two Thai families with Norrie disease (ND): association of two novel missense mutations with severe ND phenotype, seizures, and a manifesting carrier. *Am J Med Genet* 2001;100:52-5.
14. Allen RC, Russell SR, Streb LM, et al. Phenotypic heterogeneity associated with a novel mutation (Gly112Glu) in the Norrie disease protein. *Eye (Lond)* 2006;20:234-41.
15. Zaremba J, Feil S, Juszko J, et al. Intrafamilial variability of the ocular phenotype in a Polish family with a missense mutation (A63D) in the Norrie disease gene. *Ophthalmic Genet* 1998;19:157-64.
16. Stores G, Ramchandani P. Sleep disorders in visually impaired children. *Dev Med Child Neurol* 1999;41:348-52.
17. Vossler DG, Wyler AR, Wilkus RJ, et al. Cataplexy and monoamine oxidase deficiency in Norrie disease. *Neurology* 1996;46:1258-61.
18. Harendra de Silva DG, de Silva DB. Norrie's disease in an Asian family. *The British journal of ophthalmology* 1988;72:62-64.



19. Dale N, Sonksen P. Developmental outcome, including setback, in young children with severe visual impairment. *Dev Med Child Neurol* 2002;44:613-22.
20. Dale NJ, Tadic V, Sonksen P. Social communicative variation in 1-3-year-olds with severe visual impairment. *Child Care Health Dev* 2014;40:158-64.
21. Harris J, Lord C. Mental health of children with vision impairment at 11 years of age. *Dev Med Child Neurol* 2016;58:774-9.
22. Brabyn JA, Schneck ME, Haegerstrom-Portnoy G, et al. Dual sensory loss: overview of problems, visual assessment, and rehabilitation. *Trends Amplif* 2007;11:219-26.
23. Simon HJ, Levitt H. Effect of dual sensory loss on auditory localization: implications for intervention. *Trends Amplif* 2007;11:259-72.
24. Bleeker-Wagemakers EM, Zweije-Hofman I, Gal A. Norrie disease as part of a complex syndrome explained by a submicroscopic deletion of the X chromosome. *Ophthalmic Paediatr Genet* 1988;9:137-42.
25. Jacques D, Dubois T, Zdanowicz N, et al. Cochlear Implants and Psychiatric Assessments: a Norrie Disease Case Report. *Psychiatr Danub* 2017;29:259-261.
26. Ellis L, Keenan L., Hodges., L. The experiences of people with rare syndromes and sensory impairments in hospitals and clinics. Available at <https://www.sense.org.uk/umbraco/surface/download/download?filepath=/media/1294/research-the-experiences-of-people-with-rare-syndromes-and-sensory-impairments-in-hospitals-and-clinics-report.pdf> (accessed 06 December 2019). 2015.
27. Chow CC, Kiernan DF, Chau FY, et al. Laser photocoagulation at birth prevents blindness in Norrie's disease diagnosed using amniocentesis. *Ophthalmology* 2010;117:2402-6.
28. Ghosh M, Sharma S, Shastri S, et al. Norrie disease: first mutation report and prenatal diagnosis in an Indian family. *Indian J Pediatr* 2012;79:1529-31.
29. Redmond RM, Vaughan JI, Jay M, et al. In-Utero Diagnosis of Norrie Disease by Ultrasonography. *Ophthalmic Paediatrics and Genetics* 1993;14:1-3.
30. Wu LH, Chen L-H, Xie H, et al. Prenatal Diagnosis of a Case of Norrie Disease with Late Development of Bilateral Ocular Malformation. *Fetal and Pediatric Pathology* 2017;36:240-245.
31. Yahalom C, Macarov M, Lazer-Derbeko G, et al. Preimplantation genetic diagnosis as a strategy to prevent having a child born with an heritable eye disease. *Ophthalmic Genet* 2018;39:450-456.
32. Callaway NF, Berrocal AM. Wnt-Spectrum Vitreoretinopathy Masquerading as Congenital Toxoplasmosis. *Ophthalmic Surg Lasers Imaging Retina* 2018;49:446-450.
33. Sims KB, Irvine AR, Good WV. Norrie disease in a family with a manifesting female carrier. *Arch Ophthalmol* 1997;115:517-9.
34. Walsh MK, Drenser KA, Capone A, Jr., et al. Early vitrectomy effective for Norrie disease. *Arch Ophthalmol* 2010;128:456-60.



- 1  
2  
3  
4  
5  
6  
7  
8  
9  
10  
11  
12  
13  
14  
15  
16  
17  
18  
19  
20  
21  
22  
23  
24  
25  
26  
27  
28  
29  
30  
31  
32  
33  
34  
35  
36  
37  
38  
39  
40  
41  
42  
43  
44  
45  
46  
47  
48  
49  
50  
51  
52  
53  
54  
55  
56  
57  
58  
59  
60
- 1 35. Sisk RA, Hufnagel RB, Bandi S, et al. Planned Preterm Delivery and  
2 Treatment of Retinal Neovascularization in Norrie Disease.  
3 Ophthalmology 2014;121:1312-1313.  
4 36. Dale NJ, Sakkalou E, O'Reilly MA, et al. Home-based early intervention  
5 in infants and young children with visual impairment using the  
6 Developmental Journal: longitudinal cohort study. Dev Med Child  
7 Neurol 2019;61:697-709.  
8 37. Rehm HL, Zhang DS, Brown MC, et al. Vascular defects and  
9 sensorineural deafness in a mouse model of Norrie disease. J Neurosci  
10 2002;22:4286-92.  
11 38. Walker EA, Holte L, McCreery RW, et al. The Influence of Hearing Aid  
12 Use on Outcomes of Children With Mild Hearing Loss. Journal of  
13 Speech, Language, and Hearing Research 2015;58:1611-1625.  
14 39. Tribukait A, Brantberg K, Bergenius J. Function of semicircular canals,  
15 utricles and saccules in deaf children. Acta Otolaryngol 2004;124:41-8.  
16 40. Giagazoglou P, Amiridis IG, Zafeiridis A, et al. Static balance control  
17 and lower limb strength in blind and sighted women. Eur J Appl Physiol  
18 2009;107:571-9.  
19 41. University of Groningen. The National Multidisciplinary CHARGE Clinic.  
20 Available at  
21 <https://www.rug.nl/research/genetics/research/chargesyndrome/charge-clinic?lang=en>  
22 (accessed 03 September 2020).  
23 42. Dijk DR, Bocca G, van Ravenswaaij-Arts CM. Growth in CHARGE  
24 syndrome: optimizing care with a multidisciplinary approach. J  
25 Multidiscip Healthc 2019;12:607-620.  
26

1  
2  
3  
4  
5  
6  
7  
8  
9  
10  
11  
12  
13  
14  
15  
16  
17  
18  
19  
20  
21  
22  
23  
24  
25  
26  
27  
28  
29  
30  
31  
32  
33  
34  
35  
36  
37  
38  
39  
40  
41  
42  
43  
44  
45  
46  
47  
48  
49  
50  
51  
52  
53  
54  
55  
56  
57  
58  
59  
60

1 **TABLES AND FIGURES**

2 **Figure 1. Features and Management of Norrie Disease**

3  
4 In addition to blindness and hearing loss, Norrie disease (ND) can present with a range of other  
5 neurological, psychological and systemic features (left), making this a complex disease. Due to its  
6 complexity, ND patients should have a multidisciplinary team involved in their care and development  
7 (right) in order to support all aspects of life and optimise their chance of success.

8  
9  
10 **Figure 2. Patient and Caregiver Experiences: Impact of Dual Sensory**

11 **Impairment**

12 The impact of hearing loss in ND affects many aspects of day-to-day life. Quotations were provided by  
13 the Norrie Disease Foundation. ND: Norrie Disease.

14  
15  
16 **Figure 3. Norrie Disease Diagnostic Pathway**

17  
18 At present, no guidelines or set routes for diagnosis of ND are available – this pathway represents a  
19 typical route for patients as observed in day-to-day clinical practice and is informed by the authoring  
20 clinicians. Referral to specialist developmental services should be made as soon as the child is assessed  
21 to be blind. ND: Norrie Disease.

22  
23 **Figure 4. Management and monitoring of Norrie Disease patients**

24  
25 \*Assessment by Audiology for subclinical hearing loss should also be performed as soon as possible  
26 after diagnosis, such that any losses can be managed quickly and appropriately. ND: Norrie Disease.

27  
28  
29 **Figure 5. Advantages of Dual Sensory Clinics**

30  
31 Advantages of Dual Sensory clinics, informed by published literature.

32  
33  
34 **Figure 6. Patient and Caregiver Experiences: Dual Sensory Clinics**

35  
36 Quotations were provided by the Norrie Disease Foundation. ND: Norrie Disease.

1  
2  
3  
4  
5  
6  
7  
8  
9  
10  
11  
12  
13  
14  
15  
16  
17  
18  
19  
20  
21  
22  
23  
24  
25  
26  
27  
28  
29  
30  
31  
32  
33  
34  
35  
36  
37  
38  
39  
40  
41  
42  
43  
44  
45  
46  
47  
48  
49  
50  
51  
52  
53  
54  
55  
56  
57  
58  
59  
60

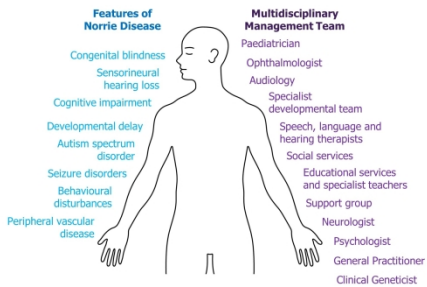

338x190mm (300 x 300 DPI)

1  
2  
3  
4  
5  
6  
7  
8  
9  
10  
11  
12  
13  
14  
15  
16  
17  
18  
19  
20  
21  
22  
23  
24  
25  
26  
27  
28  
29  
30  
31  
32  
33  
34  
35  
36  
37  
38  
39  
40  
41  
42  
43  
44  
45  
46  
47  
48  
49  
50  
51  
52  
53  
54  
55  
56  
57  
58  
59  
60

**Norrie Disease Voices: Impact of Disease**

**Box 1:** 'Having multisensory impairment has caused my son to have very complex additional needs, so much more than just blindness or hearing loss alone. When one accompanies the other, we feel the disability is far greater and much more difficult to overcome'  
*-Parent of a ND patient experiencing hearing loss*

**Box 3:** 'Over the years, as my hearing has deteriorated, I've found noisy environments more and more difficult. Even though I now use a hand-held microphone which I give to people I'm meeting with, going to restaurants makes me nervous.'  
*-Adult ND patient who first noticed hearing loss around age 10*

**Box 2:** 'I got two [hearing] aids around age 26... [I] still do and probably always will struggle in social situations.'  
*-Adult ND patient who first noticed hearing loss around age 11*

**Box 4:** 'Hearing aids are very expensive and no insurance pays for them... The aids do break... I keep old hearing aids so he has a back up to use when his hearing aids are being fixed.'  
*-Parent of a ND patient who began to use hearing aids at age 11*

**Box 5:** 'When [our son] is being taken care of by others we worry about the safety of the [hearing] aids. There have been a couple of times when my son has tossed the aids somewhere outside and they could not be found. They cost a great deal of money and insurance does not cover the full amount. Then there is the period when new [hearing] aids have to be made so my son has to be without [hearing] aids. We finally opted to have two pairs of aids at all times, which costs even more money.'  
*-Parent of a ND patient whose hearing loss was noticed at age 11 and has cognitive and behavioural symptoms*

338x190mm (300 x 300 DPI)

1  
2  
3  
4  
5  
6  
7  
8  
9  
10  
11  
12  
13  
14  
15  
16  
17  
18  
19  
20  
21  
22  
23  
24  
25  
26  
27  
28  
29  
30  
31  
32  
33  
34  
35  
36  
37  
38  
39  
40  
41  
42  
43  
44  
45  
46  
47  
48  
49  
50  
51  
52  
53  
54  
55  
56  
57  
58  
59  
60

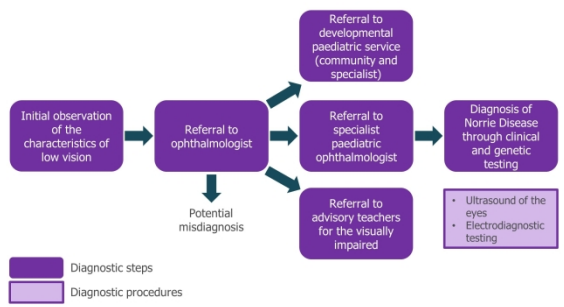

338x190mm (300 x 300 DPI)

**Annual monitoring by Ophthalmology**

Monitoring to ensure eyes are not painful, ocular symptoms are treated and adequate low vision educational support is given. Surgery may be considered in order to maintain light perception, if present

**Monitoring by Audiology every 6–12 months\***

Monitoring for subclinical hearing loss or hearing loss progression, followed by timely intervention

**Management by allied healthcare professionals**

Referral in infancy to child development team for developmental surveillance and care coordination. Professionals should include paediatricians, hearing, speech and language therapists, an educational team, social workers, support groups and psychologists

**Monitoring in primary care, with referral to other specialists e.g. a neurologist, if required****Ongoing habilitation, counselling and psychology support**

338x190mm (300 x 300 DPI)

1  
2  
3  
4  
5  
6  
7  
8  
9  
10  
11  
12  
13  
14  
15  
16  
17  
18  
19  
20  
21  
22  
23  
24  
25  
26  
27  
28  
29  
30  
31  
32  
33  
34  
35  
36  
37  
38  
39  
40  
41  
42  
43  
44  
45  
46  
47  
48  
49  
50  
51  
52  
53  
54  
55  
56  
57  
58  
59  
60

**Multidisciplinary diagnostic facility** 

- Appropriate communication with patients
- Awareness of rare sensory disorders
- Communication between specialists
- Collaboration and knowledge sharing between clinicians

**Appropriate environment** 

- Working hearing loop
- Appropriate waiting and bathroom facilities
- Designed for children with complex sensory impairment disorders

**Convenience** 

- Fewer trips to different clinics and specialists
- Most important tests performed at each visit

**Early detection of problems** 

- Monitor many disease elements in one visit
- Identification of new symptoms more quickly
- Referral to specialists within the same clinic

338x190mm (300 x 300 DPI)

1  
2  
3  
4  
5  
6  
7  
8  
9  
10  
11  
12  
13  
14  
15  
16  
17  
18  
19  
20  
21  
22  
23  
24  
25  
26  
27  
28  
29  
30  
31  
32  
33  
34  
35  
36  
37  
38  
39  
40  
41  
42  
43  
44  
45  
46  
47  
48  
49  
50  
51  
52  
53  
54  
55  
56  
57  
58  
59  
60

**Norrie Disease Voices: Dual Sensory Clinic Experiences**

**Box 1:** 'The clinic was very good and the staff very friendly and helpful. It was a very tiring day for us all due to all the tests and the journey too but beneficial to do them all in one go.'

*-Parent of a ND patient*

**Box 3:** 'We find attending the combined appointments much more manageable. The doctors had a wider understanding of how dual sensory loss affects every aspect of [my son's] life, including communication and mobility, and that some tests just wouldn't be appropriate.'

*-Parent of a ND patient*

**Box 2:** 'All the staff at the hospital that dealt with [my son] were friendly, professional and explained what was happening. Seeing [ophthalmologist] at the clinic was a particularly good experience, he took time to explain everything to [my son] and it was a relief to be seen by someone who has knowledge of Norrie Disease.'

*-Parent of a ND patient*

**Box 4:** 'It is such a time saver to be seen on one day for two appointments which helps so much in terms of cutting down on childcare [for my other child]; travel expenses; time missed at school for the patient and work days missed for the parents.'

*-Parent of a ND patient*

**Box 5:** 'The appointment was very relaxed and [my son] felt comfortable with the environment he was in... The staff were brilliant with [my son]. Because of his developmental delays, he doesn't understand what is happening and can get quite distressed with clinic appointments. They all took time to make [my son] feel comfortable before trying to complete the tests.'

*-Parent of a ND patient*

338x190mm (300 x 300 DPI)
